# Supplementary material for: A phylogenetically-conserved axis of thalamocortical connectivity in the human brain
Source: PubMed Central journal article supplement (PMC10533558; doi:10.1038/s41467-023-41722-8), 2023-09-27
Supplement: 41467_2023_41722_MOESM3_ESM.pdf [file 41467_2023_41722_MOESM3_ESM.pdf]

## Description of Additional Supplementary Files:

**Supplementary Data 1:** The concatenated connectivity and gene expression matrix for all 921 thalamic seeds across 250 cortical regions and 2228 genes for the human data.

**Supplementary Data 2:** The first 500 components of the PCA on the concatenated connectivity and gene expression human data.

**Supplementary Data 3:** The concatenated connectivity and gene expression matrix for all 35 thalamic nuclei across 38 cortical regions and 447 genes for the mouse data.

**Supplementary Data 4:** The PCA results for the concatenated connectivity and gene expression mouse data.

**Supplementary Data 5:** Loadings for human and mouse genes across PC1, PC2, and PC3. Also lists overlapping genes between human and mouse datasets.

**Supplementary Data 6:** A list of the 100 genes with the highest/lowest loadings for PC1, PC2, and PC3.

**Supplementary Data 7:** Enrichment for cell class, neuron subtype, and neuron subcluster for the top 100 genes with the highest/lowest loadings for PC1.

**Supplementary Data 8:** Enrichment for cell class, neuron subtype, and neuron subcluster for the top 100 genes with the highest/lowest loadings for PC2.

**Supplementary Data 9:** Enrichment for cell class, neuron subtype, and neuron subcluster for the top 100 genes with the highest/lowest loadings for PC3.

**Supplementary Data 10:** List of genes showing significant differential expression across development for PC1, PC2, and PC3.

**Supplementary Data 11:** Enrichment for disease for the top 100 genes with the highest/lowest loadings for PC1. Also lists the genes linked to significantly enriched diseases.

**Supplementary Data 12:** Enrichment for disease for the top 100 genes with the highest/lowest loadings for PC2. Also lists the genes linked to significantly enriched diseases.

**Supplementary Data 13:** Enrichment for disease for the top 100 genes with the highest/lowest loadings for PC3. Also lists the genes linked to significantly enriched diseases.
